# Supplementary material for: Computational Identification and 3D Morphological Characterization of Renal Glomeruli in Optically Cleared Murine Kidneys
Source: Sensors (Basel). 2021 Nov 9;21(22):7440. doi: 10.3390/s21227440 (PMC8620055; doi:10.3390/s21227440)
Supplement: Supplementary file 1 [file sensors-21-07440-s001.zip › sensors-1423291-supplementary.pdf]

## Image processing commands and functions

The following document is a step-by-step description of the commands and functions that have been applied for image processing using ImageJ/Fiji software (ImageJ 2.1.0/1.53h/Java 1.8.0\_66 (64-bit)).

Downloading *3D Suites* plugin is mandatory to fully perform the following instructions.

After each step, the image should be saved as a new TIFF file.

### 1. Image conversion and calibration

The stack is converted to 8-bits format using the following functions: *Image > Type > 8-bit*

The stack is calibrated using the following functions: *Image>Properties...>* The voxel width, height and depth are entered.

### 2. Grey-level segmentation

The extraction of the 2 structures of interest is performed by a segmentation technique based on 2 greyscale-defined thresholds. The threshold values are determined from the histogram of frequency distribution of the voxel greyscale values.

The histogram is generated using the following functions: *Analyze>Histogram>* Click 'Yes' to consider all the images of the stack. The histogram hence appears in a new window.

A threshold is applied using the following functions: *Image>Adjust>Threshold...>* It should be checked that only 'Dark background' and 'Stack histogram' are ticked. The minimum threshold value is set using the command *>Apply>* selecting 'Default' in *Method* and 'Dark' in *Background*, then ticking 'Black background (of binary masks)'" *>OK*

### 3. Filtering

A 3D median filter is applied using the following functions: *Process>Filters>Median 3D...>* Enter '3' as a value for x, y and z radii.

### 4. 3D Manager Options

The isolation of the glomeruli is performed using the *3D Manager* function of the *3D Suites* plugin.

First, the function had to be programmed with the following functions: *Plugins> 3D> 3D Manager Options>* In 'Measurements' tick the boxes 'Volume (unit)', 'Surface (unit)', 'Compactness', 'Fit Ellipse'> In 'Options' tick the boxes 'Use 32-bits image for segmentation (nb objects > 65 535' and 'Sync with selected 3D viewer'> Enter, respectively '10' and '1.8' as values for 'Distance between centers (pixel)' and 'Distance max contact'

### 5. 3D volume segmentation

The isolation of the glomeruli is performed in 3 stages using the following functions: *Plugins> 3D> 3D Manager> 'RoiManager3D'.* 'RoiManager' window is open.

The first stage consisting in the elimination of the small non-glomerular labeled objects based on a 3D volume segmentation is performed using the following steps:

- a. A 32-bit analyzable version of the filtered image is generated by using the following command: Click '3D Segmentation' and set 'Low Threshold' value at '1'.
- b. Close the previous image.

- c. The objects on the image are added individually in the '*RoiManager3D*' using the following command: Click '*Add Image*'.
- d. A table with the volume information of each object is generated using the following command: '*Measure 3D*'.
- e. The table generated is saved using the following command that: '*Menu*'> '*Save*'.
- f. Once the volume threshold using the '*Vol (pix)*' column is obtained, the objects on the table are classified according to their volume by using the following command: Click on '*Vol (pix)*' column.
- g. The objects with a volume equal or higher to the volume threshold are selected on the table, and they are shown on the '*RoiManager3D*' window using the following command on the table window: '*Menu*'> '*Show Objects*'.
- h. In order to isolate these objects without using a high-capacity computer, and thus avoiding time waste, first, the image is converted to 8-bits format using the following functions: *Image* > *Type* > *8-bit*; and second, the large objects are erased from the stack using the following command '*RoiManager3D*' window: '*Erase*'.
- i. The resulting image is saved and the '*3D Manager*' windows are closed.
- j. A threshold is applied on the image to binarize it using the following functions: *Image*>*Adjust*>*Threshold...*> It should be checked that only '*Dark background*' and '*Stack histogram*' are ticked. The minimum threshold value is set at '1' using the command >*Apply*> selecting '*Default*' in *Method* and '*Dark*' in *Background*, then ticking '*Black background (of binary masks)*' >OK.
- k. The initial filtered image is open.
- l. The image eliminating the small non-glomerular labeled objects is obtained by fusing the filtered image to the last obtained image using the following commands: *Process*> *Image Calculator...* > Select the initial filtered image as first and the last obtained image as second image > Choose the '*Subtract*' operation > Tick only '*Create new window*' > OK.
- m. The resulting image is the 3D volume segmentation result.

#### 6. 3D shape segmentation

The second stage consisting in the elimination of the large non-glomerular labeled objects based on a 3D shape segmentation is performed using the following steps:

- a. The '*3D Manager*' is opened by using the following function: *Plugins*> *3D*> *3D Manager*> '*RoiManager3D*' window is open.
- b. Steps 4.a to 4.e are repeated.
- c. Once the '*RatioVolEllipsoid*' threshold using the '*RatioVolEllipsoid*' column is obtained, the objects on the table are classified on their volume by using the following command: Click on '*RatioVolEllipsoid*' column.
- d. The objects with a '*RatioVolEllipsoid*' equal or inferior to the '*RatioVolEllipsoid*' threshold are selected on the table, and they are shown on the '*RoiManager3D*' window using the following command on the table window: '*Menu*'> '*Show Objects*'.
- e. The objects are erased from the stack using the following command '*RoiManager3D*' window: '*Erase*'.
- f. The resulting image is saved and the '*3D Manager*' windows are kept open.

## 7. Artefacts elimination

The last stage consisting in the elimination of the artefactual objects is performed using the following steps:

- a. On the table, the objects with a volume inferior to 10,000 pixels are selected and they are shown on the '*RoiManager3D*' window using the following command on the table window: '*Menu*'> '*Show Objects*'.
- b. The objects are erased from the stack using the following command '*RoiManager3D*' window: '*Erase*'.
- c. A final table with all the desired information is generated using the following command: '*Measure 3D*'.
- d. The generated table is saved using the following command that: '*Menu*'> '*Save*'.
- e. The final image is saved and the '*3D Manager*' windows are closed.
